# Supplementary material
Source: MDPI journal article supplement (https://www.mdpi.com/2072-4292/13/23/4924)
Supplement: s1 [file s1]

## Supplementary Materials

Table S1. List of vegetation indices computed from Sentinel 2 data.

| Acronymous | Formula                                                  | Full name                                            |
|------------|----------------------------------------------------------|------------------------------------------------------|
| NDVI       | $B8 - B4 / B8 + B4$                                      | Normalized Difference Vegetation Index               |
| GNDVI      | $B8 - B3 / B8 + B3$                                      | Green Normalized Difference Vegetation Index         |
| MCARI      | $(B5 - B4) - 0.2 * (B5 - B3) * (B5 - B4)$                | Modified Chlorophyll Absorption in Reflectance Index |
| S2REP      | $705 + 35 * (B4 + B7) / 2 - B5 / (B6 - B5)$              | Sentinel-2 Red-edge position                         |
| IRECI      | $B7 - B4 / (B5 / B6)$                                    | Inverted Red-edge                                    |
| SAVI       | $B8 - B4 / (B8 + B4 + 0.5) * (1.0 + 0.5)$                | Soil-Adjusted Vegetation Index with red and red-edge |
| NDMI       | $B8a - B11 / B8a + B11$                                  | Normalized differences moisture index                |
| EVI        | $2.5 * (B8 - B4) / (B8 + (6 * B4) - (7.5 * B2) + 1)$     | Enhanced Vegetation Index                            |
| EVI2       | $2.5 * (B8 - B4) / (B8 + (6 * B4) - (2.4 * B2) + 1)$     | Enhanced Vegetation Index-2                          |
| NDRE1      | $B6 - B5 / B6 + B5$                                      | Normalized Difference Red-edge                       |
| NDRE2      | $B8 - B5 / B8 + B5$                                      | Normalized Difference Red-edge                       |
| CIrededge1 | $B7 / B5 - 1$                                            | Chlorophyll Index Red-edge                           |
| CIgreen    | $B7 / B3 - 1$                                            | Chlorophyll Index Green                              |
| CIgreen2   | $B8 / B3 - 1$                                            | Red and Red-edge modified Chlorophyll Index          |
| ARVI       | $B8 - (2 * B4) + B2 / (B8 + (2 * B4) + B2)$              | Atmospherically Resistant Vegetation Index           |
| SIPI       | $B8 - B2 / B8 - B4$                                      | Structure Intensive Pigment Index                    |
| MSAVI      | $2 * B8 + 1 - \sqrt{(2 * B8 + 1)^2 - 8 * (B8 - B5)} / 2$ | Modified Soil-Adjusted Vegetation Index              |
| OSAVI      | $1.16 * B8 - B4 / B8 + B4 + 0.16$                        | Optimized Soil-Adjusted Vegetation Index             |
| NDWI1      | $B8 - B11 / B8 + B11$                                    | Green Normalized Difference Vegetation Index         |
| NDWI2      | $B3 - B8 / B3 + B8$                                      | Normalized Difference Vegetation Index               |
| ARI        | $(1 / B3) - (1 / B5) * B7$                               | Anthocyanin Reflectance Index                        |
